# Supplementary material for: A Comparative Analysis of Transcription Factor Expression during Metazoan Embryonic Development
Source: PubMed Central journal article supplement (PMC3682979; doi:10.1371/journal.pone.0066826), 2013-06-14

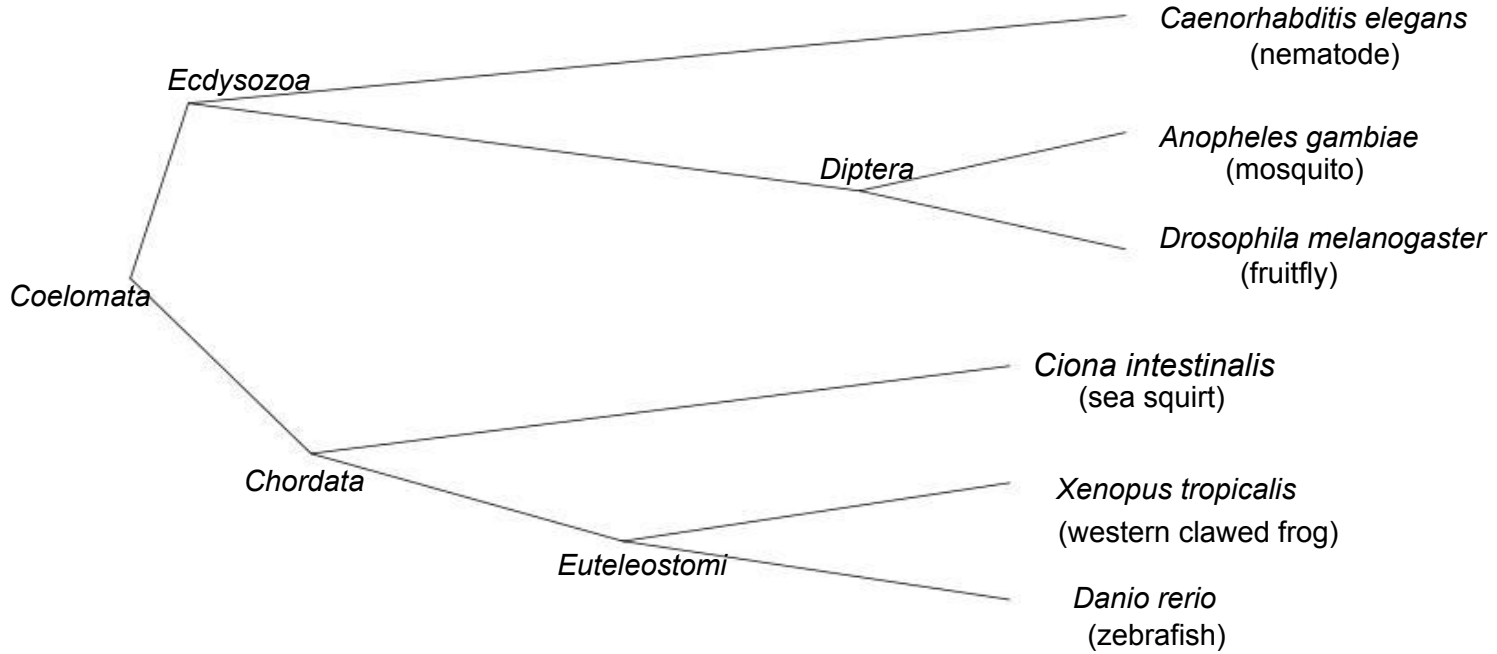

Supplement: pone.0066826.s001.pdf [file pone.0066826.s001.pdf]
