# Supplementary material for: A Comparative Analysis of Transcription Factor Expression during Metazoan Embryonic Development
Source: PubMed Central journal article supplement (PMC3682979; doi:10.1371/journal.pone.0066826), 2013-06-14
Supplement: pone.0066826.s004.pdf [file pone.0066826.s004.pdf]

| Species                        | Total TFs | Homeobox  | ZF-C2H2   | ZF-C4    | HLH      | bZIP     |
|--------------------------------|-----------|-----------|-----------|----------|----------|----------|
| <i>Danio rerio</i>             | 728 (64%) | 202 (82%) | 136 (42%) | 59 (91%) | 87 (78%) | 35 (65%) |
| <i>Ciona intestinalis</i>      | 257 (81%) | 51 (78%)  | 62 (84%)  | 13 (93%) | 28 (85%) | 16 (84%) |
| <i>Drosophila melanogaster</i> | 452 (86%) | 74 (78%)  | 194 (85%) | 16 (76%) | 45 (86%) | 15 (94%) |
| <i>Caenorhabditis elegans</i>  | 252 (41%) | 51 (62%)  | 26 (28%)  | 59 (25%) | 19 (51%) | 8 (38%)  |
