# Supplementary material for: A Comparative Analysis of Transcription Factor Expression during Metazoan Embryonic Development
Source: PubMed Central journal article supplement (PMC3682979; doi:10.1371/journal.pone.0066826), 2013-06-14
Supplement: pone.0066826.s005.pdf [file pone.0066826.s005.pdf]

| Species                                  | Total TFs | Homeobox  | ZF-C2H2    | ZF-C4     | HLH       | bZIP      |
|------------------------------------------|-----------|-----------|------------|-----------|-----------|-----------|
| <i>Danio rerio</i>                       | 917 (81%) | 209 (85%) | 244 (74%)  | 58 (89%)  | 91 (81%)  | 47 (87%)  |
| <i>Xenopus tropicalis</i>                | 889 (90%) | 184 (97%) | 274 (78%)  | 45 (98%)  | 87 (99%)  | 44 (100%) |
| <i>Drosophila melanogaster</i> (array)   | 537 (98%) | 94 (99%)  | 222 (97%)  | 21 (100%) | 52 (100%) | 16 (100%) |
| <i>Drosophila melanogaster</i> (RNA-Seq) | 543 (99%) | 94 (99%)  | 228 (100%) | 21 (100%) | 51 (98%)  | 15 (94%)  |
| <i>Anopheles gambiae</i>                 | 489 (88%) | 78 (90%)  | 220 (84%)  | 20 (91%)  | 37 (90%)  | 18 (82%)  |
| <i>Caenorhabditis elegans</i>            | 459 (75%) | 66 (80%)  | 70 (74%)   | 184 (79%) | 28 (76%)  | 12 (57%)  |
