# Supplementary material for: A Comparative Analysis of Transcription Factor Expression during Metazoan Embryonic Development
Source: PubMed Central journal article supplement (PMC3682979; doi:10.1371/journal.pone.0066826), 2013-06-14
Supplement: pone.0066826.s006.pdf [file pone.0066826.s006.pdf]

| Cluster | GO.ID      | Term                                        | All TFs | In Cluster | P-value |
|---------|------------|---------------------------------------------|---------|------------|---------|
| 1       | GO:0042074 | cell migration involved in gastrulation     | 11      | 6          | 0.0029  |
| 2       | GO:0007275 | multicellular organismal development        | 323     | 45         | 0.0013  |
| 3       | GO:0060788 | ectodermal placode formation                | 13      | 6          | 0.0012  |
| 3       | GO:0035121 | tail morphogenesis                          | 3       | 3          | 0.0013  |
| 5       | GO:0007275 | multicellular organismal development        | 323     | 94         | 2.6e-14 |
| 5       | GO:0043010 | camera-type eye development                 | 38      | 16         | 0.0052  |
| 5       | GO:0006355 | regulation of transcription, DNA-depende... | 612     | 119        | 0.0066  |
| 7       | GO:0007165 | signal transduction                         | 133     | 27         | 0.0088  |
| 7       | GO:0043401 | steroid hormone mediated signaling pathw... | 56      | 14         | 0.0089  |
| 9       | GO:0043524 | negative regulation of neuron apoptosis     | 2       | 1          | 0.0086  |
