# Supplementary material for: A Comparative Analysis of Transcription Factor Expression during Metazoan Embryonic Development
Source: PubMed Central journal article supplement (PMC3682979; doi:10.1371/journal.pone.0066826), 2013-06-14
Supplement: pone.0066826.s007.pdf [file pone.0066826.s007.pdf]

| Cluster | GO.ID      | Term                                        | All TFs | In Cluster | P-value |
|---------|------------|---------------------------------------------|---------|------------|---------|
| 1       | GO:0016573 | histone acetylation                         | 4       | 3          | 0.0059  |
| 2       | GO:0007067 | mitosis                                     | 2       | 2          | 0.0071  |
| 2       | GO:0051301 | cell division                               | 4       | 2          | 0.0381  |
| 4       | GO:0045944 | positive regulation of transcription fro... | 20      | 10         | 1.1e-05 |
| 4       | GO:0009952 | anterior/posterior pattern specification    | 22      | 14         | 0.00035 |
| 4       | GO:0014034 | neural crest cell fate commitment           | 8       | 5          | 0.00061 |
| 4       | GO:0045665 | negative regulation of neuron differenti... | 3       | 3          | 0.00131 |
| 4       | GO:0030902 | hindbrain development                       | 11      | 8          | 0.00143 |
| 4       | GO:0001756 | somitogenesis                               | 7       | 5          | 0.00166 |
| 4       | GO:0030917 | midbrain-hindbrain boundary development     | 6       | 4          | 0.00175 |
| 4       | GO:0045666 | positive regulation of neuron differenti... | 6       | 4          | 0.00175 |
| 4       | GO:0051090 | regulation of sequence-specific DNA bind... | 14      | 6          | 0.00376 |
| 4       | GO:0042472 | inner ear morphogenesis                     | 13      | 7          | 0.00420 |
| 4       | GO:0033504 | floor plate development                     | 6       | 4          | 0.00465 |
| 4       | GO:0006916 | anti-apoptosis                              | 4       | 3          | 0.00481 |
| 4       | GO:0000122 | negative regulation of transcription fro... | 17      | 6          | 0.00686 |
| 4       | GO:0043049 | otic placode formation                      | 8       | 4          | 0.00686 |
| 5       | GO:0007275 | multicellular organismal development        | 192     | 56         | 3.5e-11 |
