# Supplementary material for: A Comparative Analysis of Transcription Factor Expression during Metazoan Embryonic Development
Source: PubMed Central journal article supplement (PMC3682979; doi:10.1371/journal.pone.0066826), 2013-06-14
Supplement: pone.0066826.s008.pdf [file pone.0066826.s008.pdf]

| Cluster | GO.ID      | Term                              | All TFs | In Cluster | P-value |
|---------|------------|-----------------------------------|---------|------------|---------|
| 9       | GO:0016048 | detection of temperature stimulus | 1       | 1          | 0.0059  |
