# Supplementary material for: A Comparative Analysis of Transcription Factor Expression during Metazoan Embryonic Development
Source: PubMed Central journal article supplement (PMC3682979; doi:10.1371/journal.pone.0066826), 2013-06-14
Supplement: pone.0066826.s009.pdf [file pone.0066826.s009.pdf]

| Cluster | GO.ID      | Term                                        | All TFs | In Cluster | P-value |
|---------|------------|---------------------------------------------|---------|------------|---------|
| 1       | GO:0006978 | DNA damage response, signal transduction... | 2       | 2          | 0.0042  |
| 1       | GO:0010165 | response to X-ray                           | 2       | 2          | 0.0042  |
| 1       | GO:0010332 | response to gamma radiation                 | 2       | 2          | 0.0042  |
| 1       | GO:0031571 | mitotic cell cycle G1/S transition DNA d... | 2       | 2          | 0.0042  |
| 1       | GO:0034644 | cellular response to UV                     | 2       | 2          | 0.0042  |
| 1       | GO:0042771 | DNA damage response, signal transduction... | 2       | 2          | 0.0042  |
| 1       | GO:0043523 | regulation of neuron apoptosis              | 2       | 2          | 0.0042  |
| 6       | GO:0007179 | transforming growth factor beta receptor... | 3       | 3          | 0.00083 |
| 8       | GO:0045944 | positive regulation of transcription fro... | 5       | 4          | 0.0068  |
